# Supplementary material
Source: PubMed Central journal article supplement (PMC2948641)

Supplementary material to Tu et al. "Depletion of abundant plasma proteins..."

Figure S1. UV traces of three replicate runs of MARS-7 column (A) and MARS-14 column (B) separately

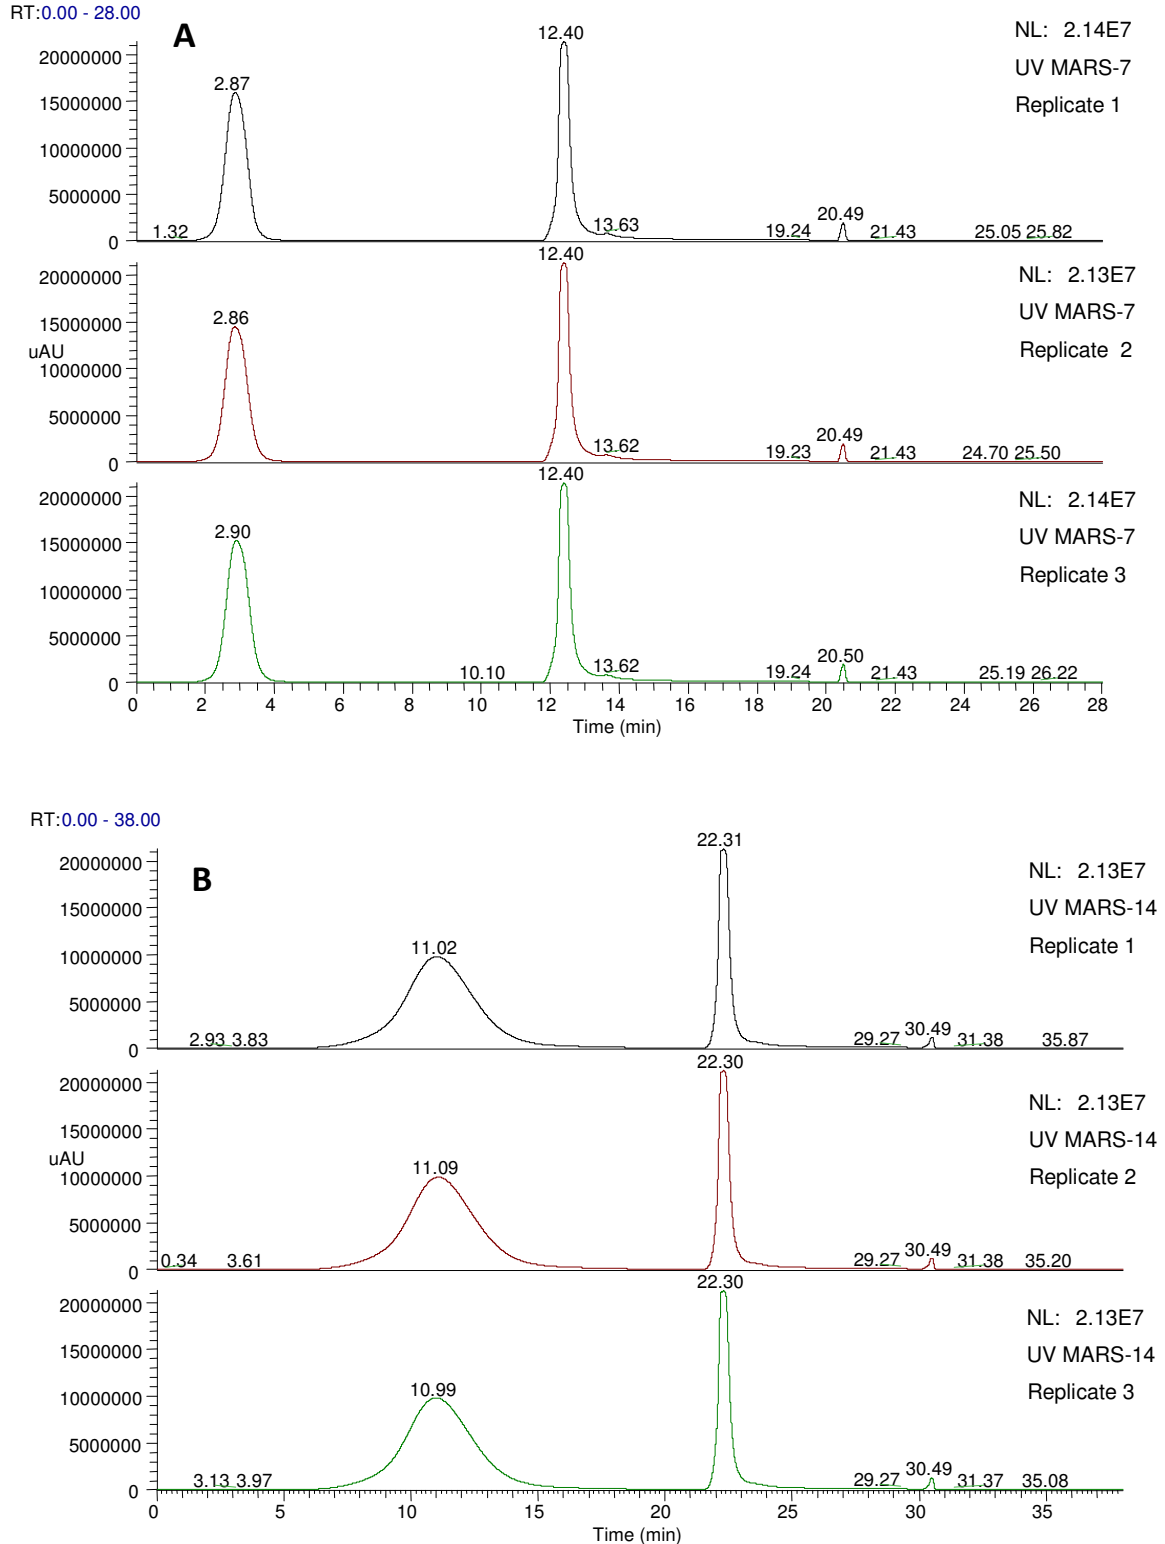

Supplement: NIHMS233594-supplement-4_si_004.pdf [file NIHMS233594-supplement-4_si_004.pdf]
